# Supplementary material for: Improved Isolation and Culture of Urine-Derived Stem Cells (USCs) and Enhanced Production of Immune Cells from the USC-Derived Induced Pluripotent Stem Cells
Source: PubMed Central journal article supplement (PMC7141314; doi:10.3390/jcm9030827), 2020-03-18
Supplement: jcm-09-00827-s001.pdf [file jcm-09-00827-s001.pdf]

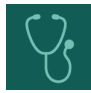

**Supplementary Table 1.** Primer sequences

| Accession no.  | Gene           | Forward primer sequence (5'-3') | Reverse primer sequence (5'-3') | Application                        |
|----------------|----------------|---------------------------------|---------------------------------|------------------------------------|
| NM_004360      | E-cadherin     | CAGCACGTACACAGCCCTAA            | ACCCACCTCTAAGGCCATCT            | epithelial markers                 |
| NM_021101      | Claudin1       | TTGACTCCTTGCTGAATCTGAG          | TTCTGCACCTCATCGTCTTC            |                                    |
| NM_002538      | Ocludin        | CTTCAGGCAGCCTCGTTACA            | TCCTCCTCCAGCTCATCACA            |                                    |
| NM_003380      | Vimentin       | CTGCCTCTTCCAAACTTTTCC           | GTGATGCTGAGAAGTTTCGTTG          | fibroblast markers                 |
| NM_000474      | Twist1         | CTCAGCTACGCCTTCTCG              | ACTGTCCATTTTCTCCTTCTCTG         |                                    |
| NM_001365518   | Fibronectin    | CTGGCCAGTCTACAACCAG             | CGGGAATCTTCTCTGTCAGC            |                                    |
| NM_006516      | SLC2A1         | CTTTTCTGTTGGGGGCATGAT           | CCGCAGTACACACCGATGAT            | renal epithelial markers           |
| NM_000425      | L1CAM          | CAAGCCCGAAGTGCAGTTC             | CTGGCAAAGCAGCGGTAGAT            |                                    |
| NM_000901      | NR3C2          | CACAGCACTGGTTCCTCAG             | TTTGCTGCTAAGCGGTGA              |                                    |
| NM_002046.5    | GAPDH          | AATCCCATCACCATCTTCCAG           | ATGACCCTTTTGGCTCCC              | housekeeping gene                  |
| NM_004364.5    | C/EBP $\alpha$ | CCACGCCTGTCTTAGAAAG             | CCCTCCACCTTCATGTAGAAC           | adipogenic markers                 |
| NM_138712.4    | PPAR $\gamma$  | GAGCCCAAGTTTGAGTTTGC            | GCAGGTTGTCTTGAATGTCTTC          |                                    |
| NM_001442.3    | FABP4          | CATGTGCAGAAATGGGATGG            | AACTTCAGTCCAGGTCAACG            |                                    |
| NM_001177800.2 | Adiponectin    | AAGGAGATCCAGGTCTTATTGG          | ACCTTCAGCCCCGGGTAC              |                                    |
| NM_152860      | Osterix        | CTCCTCTCCCTTTTCTCTCT            | GGAGCCATAGTGAACCTCCTC           | osteogenic markers                 |
| NM_001015051   | Runx2          | CGCCTCACAAACAACCACAG            | TCACTGTGCTGAAGAGGCTG            |                                    |
| NM_004598      | Osteonectin    | ATGGGAATGAGTTGGCTGG             | CCTCTTGTCTTTGGTCCC              |                                    |
| NM_000088      | COL1A1         | CCCCTGGAAAGAATGGAGATG           | TCAAACCACTGAAACCTCTG            | osteogenic/<br>chondrogenic marker |
| NM_000493      | COL10A1        | ACGATACCAAATGCCACAG             | GTACCTTGCTCTCCTTACTG            | chondrogenic markers               |
| NM_000346      | SOX9           | ACTTGCACAACGCCGAG               | CTGGTACTTGTAATCCGGGTG           |                                    |
| NM_001135      | Aggrecan       | TGTGGGACTGAAGTTCTTGG            | AGCGAGTTGTCATGGTCTG             |                                    |
| NM_002701      | OCT4           | CAATTGCCAAGCTCCTGAAG            | GTTGCCTCTCACTCGGTTC             | hPSC pluripotency<br>markers       |
| NM_003106      | SOX2           | TTCACATGTCCAGCACTAC             | TCCATGCTGTTTCTTACTCTC           |                                    |
| NM_024865      | NANOG          | CAGAAATACCTCAGCCTCCAG           | GCCACCTTTAGATTTTCTCTCTG         |                                    |

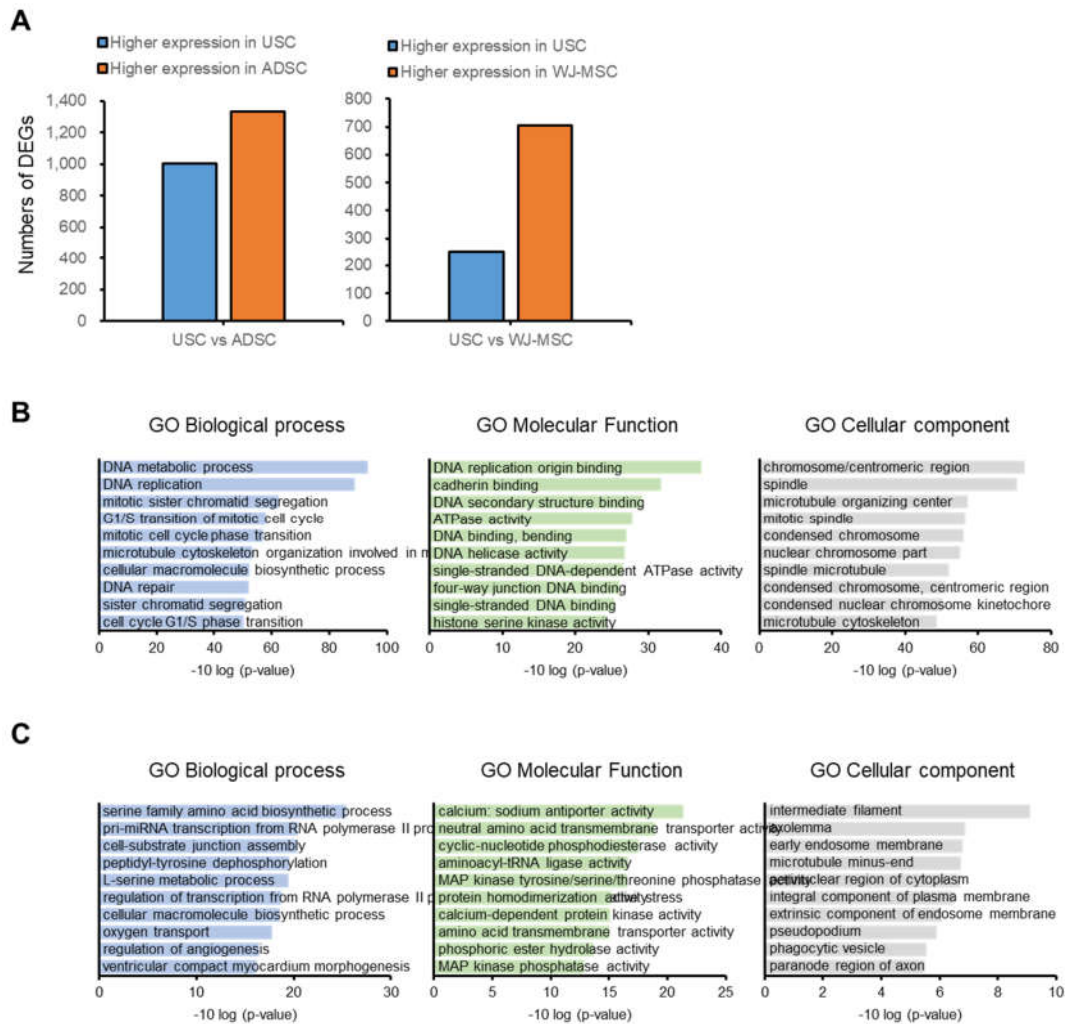

**Supplementary Figure 1.** RNA sequencing of USCs, ADSCs, and WJ-MSCs. (A) The number of differentially expressed genes between USCs and ADSCs, and between USCs and WJ-MSCs ( $q$ -value  $\leq 0.01$ ). (B) Functional enrichment analysis of more highly expressed genes in USCs (ADSC vs USC) and (C) Functional enrichment analysis of more highly expressed genes in USCs (WJ-MSC vs USC).

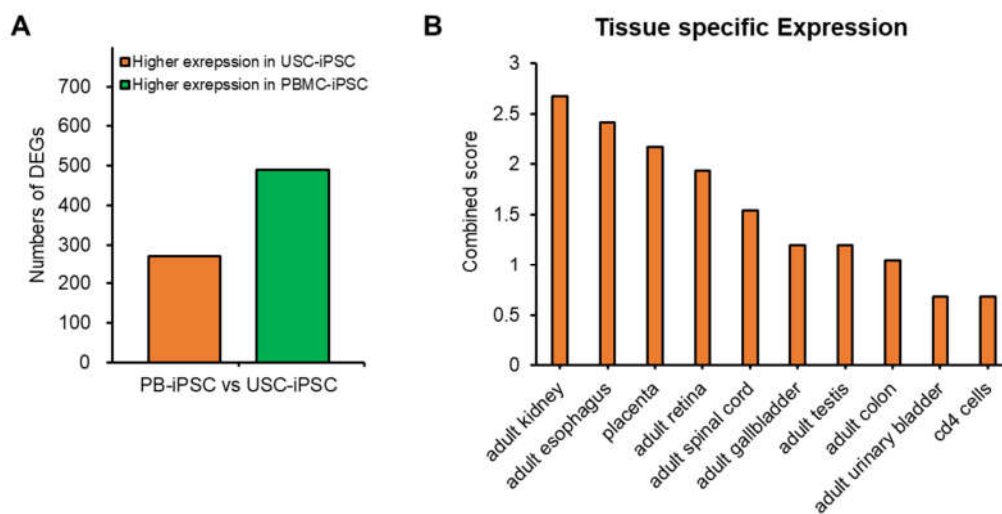

**Supplementary Figure 2.** RNA sequencing of PBMCs, USCs, ESCs, USC-iPSCs, and PBMC-iPSCs. (A) The differentially expressed genes between PBMC-iPSCs and USC-iPSCs are shown as upregulated genes ( $q$ -value  $\leq 0.01$ ). (B) Tissue-specific gene expression in USC-iPSCs compared with PBMC-iPSCs.

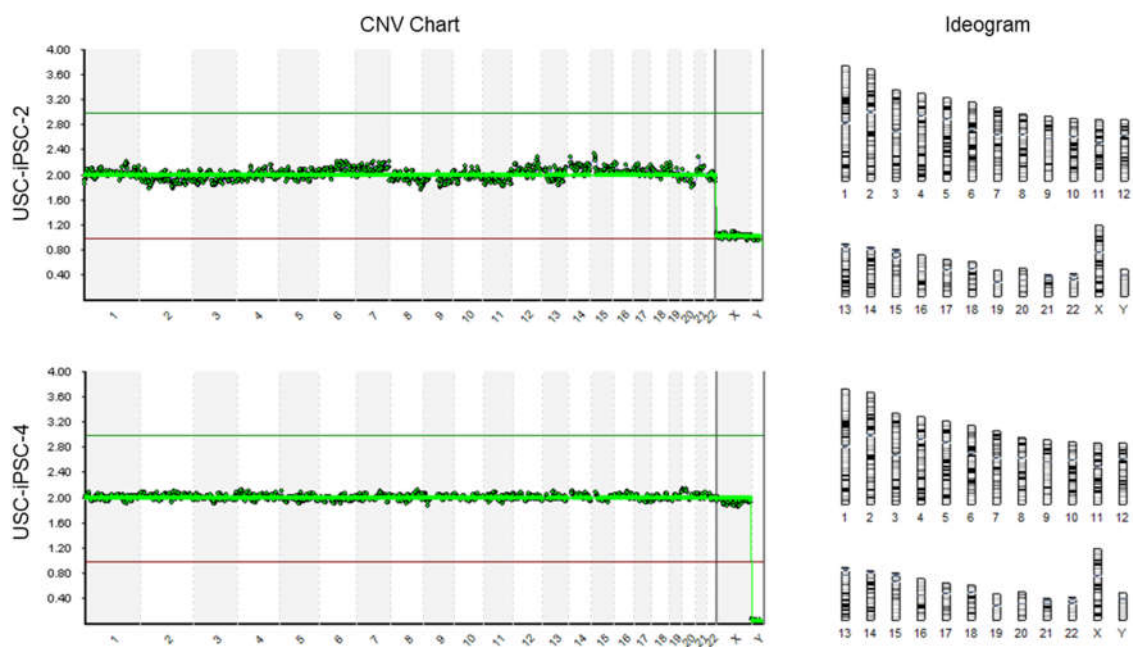

Supplementary Figure 3. Chromosome abnormalities of USC-iPSCs.

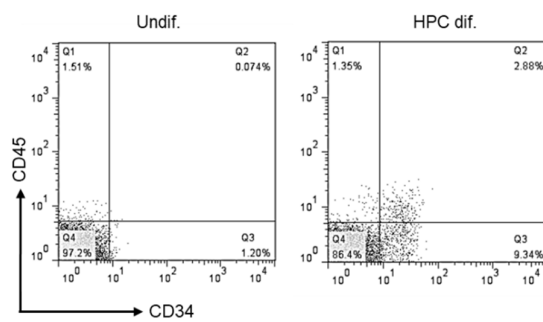

**Supplementary Figure 4.** Flow cytometry analysis of HPC markers of differentiated USC-iPSC-2 derived HPCs.
